# Supplementary material
Source: HighWire-hosted journal article supplement (https://lupus.bmj.com/content/10/2/e000977)
Supplement: inline-supplementary-material-1 [file inline-supplementary-material-1.pdf]

**Supplementary table 1. Spectral Domain-Optical coherence tomography data of SLE and HC.**

|                             | <b>SLE (N=43)</b> | <b>HC (N=34)</b>  | <b>p</b>     |
|-----------------------------|-------------------|-------------------|--------------|
| Retina OT ( $\mu\text{m}$ ) | 277.3 $\pm$ 13.75 | 283.1 $\pm$ 14.75 | 0.087        |
| Retina IT ( $\mu\text{m}$ ) | 326.4 $\pm$ 19.4  | 335.8 $\pm$ 14.44 | <b>0.036</b> |
| Retina OS ( $\mu\text{m}$ ) | 299.6 $\pm$ 13.87 | 303.7 $\pm$ 13.56 | 0.221        |
| Retina IS ( $\mu\text{m}$ ) | 344.3 $\pm$ 18.78 | 352 $\pm$ 15.44   | 0.077        |
| Retina ON ( $\mu\text{m}$ ) | 314.9 $\pm$ 17.56 | 323.9 $\pm$ 17.44 | <b>0.035</b> |
| Retina IN ( $\mu\text{m}$ ) | 342.8 $\pm$ 19.33 | 352.1 $\pm$ 17.49 | <b>0.043</b> |
| Retina OI ( $\mu\text{m}$ ) | 286.1 $\pm$ 16.27 | 297 $\pm$ 24.65   | <b>0.016</b> |
| Retina II ( $\mu\text{m}$ ) | 337.4 $\pm$ 18.01 | 345.3 $\pm$ 23.08 | 0.091        |
| Retina F ( $\mu\text{m}$ )  | 277.8 $\pm$ 27.89 | 279.1 $\pm$ 15.61 | 0.839        |
| GCL OT ( $\mu\text{m}$ )    | 34.3 $\pm$ 5.07   | 36.36 $\pm$ 4.34  | 0.088        |
| GCL IT ( $\mu\text{m}$ )    | 47.56 $\pm$ 5.7   | 50.95 $\pm$ 4.32  | <b>0.011</b> |
| GCL OS ( $\mu\text{m}$ )    | 34.49 $\pm$ 3.53  | 35.82 $\pm$ 2.5   | 0.104        |
| GCL IS ( $\mu\text{m}$ )    | 53.17 $\pm$ 5.05  | 56.23 $\pm$ 3.67  | <b>0.01</b>  |
| GCL ON ( $\mu\text{m}$ )    | 37.44 $\pm$ 3.92  | 39.9 $\pm$ 3.02   | <b>0.008</b> |
| GCL IN ( $\mu\text{m}$ )    | 52.07 $\pm$ 6     | 53.36 $\pm$ 4.34  | 0.353        |
| GCL OI ( $\mu\text{m}$ )    | 33.23 $\pm$ 4.74  | 34.05 $\pm$ 2.51  | 0.441        |
| GCL II ( $\mu\text{m}$ )    | 52.3 $\pm$ 5.38   | 55.77 $\pm$ 3.91  | <b>0.006</b> |
| GCL F ( $\mu\text{m}$ )     | 16.21 $\pm$ 5.03  | 15.91 $\pm$ 3.19  | 0.789        |
| RNFL OT ( $\mu\text{m}$ )   | 20.25 $\pm$ 5.06  | 19.5 $\pm$ 2.01   | 0.503        |
| RNFL IT ( $\mu\text{m}$ )   | 18.43 $\pm$ 3.98  | 17.68 $\pm$ 1.32  | 0.387        |
| RNFL OS ( $\mu\text{m}$ )   | 40.51 $\pm$ 7.54  | 41.09 $\pm$ 5.86  | 0.74         |
| RNFL IS ( $\mu\text{m}$ )   | 27.59 $\pm$ 8.34  | 26.5 $\pm$ 2.84   | 0.548        |
| RNFL ON ( $\mu\text{m}$ )   | 53.64 $\pm$ 10.48 | 54.59 $\pm$ 8     | 0.696        |
| RNFL IN ( $\mu\text{m}$ )   | 22.75 $\pm$ 5.27  | 22.23 $\pm$ 2.52  | 0.653        |
| RNFL OI ( $\mu\text{m}$ )   | 41.45 $\pm$ 7.03  | 43.45 $\pm$ 6.02  | 0.232        |
| RNFL II ( $\mu\text{m}$ )   | 26.49 $\pm$ 4.13  | 27.14 $\pm$ 2.76  | 0.497        |
| RNFL F ( $\mu\text{m}$ )    | 13.49 $\pm$ 3.53  | 12.68 $\pm$ 1.61  | 0.301        |

SLE: systemic lupus erythematosus; HC: healthy controls; OT: outer temporal; IT: inner temporal; OS: outer superior; IS: inner superior, ON: outer nasal areas; IN: inner nasal areas; OI: outer inferior; II: inner inferior; F: foveal area; GCL: ganglion cell layer; RNFL: retinal nerve fiber layer.
